# Supplementary material for: Enteral Nutrition Prescription in Children and Adults with Inflammatory Bowel Diseases: Gaps in Current Gastroenterology Practice in Saudi Arabia
Source: MDPI journal article supplement (doi:10.3390/nu15010232), 2023-01-02
Supplement: s1 [file s1]

## Supplementary Tables and Figures

**Table S1:** Indications for using EN reported by gastroenterologists who are currently recommending EN in patients with IBD (n= 55)

| Indications                                                       | Responses % (n) |            |            |            |           |
|-------------------------------------------------------------------|-----------------|------------|------------|------------|-----------|
|                                                                   | Never           | Rarely     | Sometimes  | Frequently | Always    |
| <b>At initial diagnosis</b>                                       |                 |            |            |            |           |
| Adult gastroenterologist                                          | 9.5% (2)        | 33.3% (7)  | 52.4% (11) | 0% (0)     | 4.8% (1)  |
| Paediatric gastroenterologists                                    | 5.9% (2)        | 23.5% (8)  | 23.5% (8)  | 32.4% (11) | 14.7% (5) |
| Total                                                             | 7.3% (4)        | 27.3% (15) | 34.5% (19) | 20% (11)   | 10.9% (6) |
| <i>p-value</i> *                                                  | 0.008           |            |            |            |           |
| <b>After failing to respond to pharmacological therapy</b>        |                 |            |            |            |           |
| Adult gastroenterologist                                          | 4.8% (1)        | 33.3% (7)  | 52.4% (11) | 9.5% (2)   | 0% (0)    |
| Paediatric gastroenterologists                                    | 0% (0)          | 20.6% (7)  | 65.6% (21) | 5.9% (2)   | 11.8% (4) |
| Total                                                             | 1.8% (1)        | 25.5% (14) | 58.2% (32) | 7.3 (4)    | 7.3% (4)  |
| <i>p-value</i> *                                                  | 0.220           |            |            |            |           |
| <b>Prevention and correction of undernutrition</b>                |                 |            |            |            |           |
| Adult gastroenterologist                                          | 4.8% (1)        | 19% (4)    | 47.6% (10) | 14.3% (3)  | 14.3% (3) |
| Paediatric gastroenterologists                                    | 5.9% (2)        | 2.9% (1)   | 52.9% (18) | 20.6% (7)  | 17.6% (6) |
| Total                                                             | 5.5% (3)        | 9.1% (5)   | 50.9% (28) | 18.2% (10) | 16.4% (9) |
| <i>p-value</i> *                                                  | 0.421           |            |            |            |           |
| <b>Induction of remission in active CD</b>                        |                 |            |            |            |           |
| Adult gastroenterologist                                          | 23.8% (5)       | 19% (4)    | 42.9% (9)  | 14.3% (3)  | 0% (0)    |
| Paediatric gastroenterologists                                    | 2.9% (1)        | 20.6% (7)  | 32.4 (11)  | 26.5% (9)  | 17.6% (6) |
| Total                                                             | 10.9% (6)       | 20% (11)   | 36.4% (20) | 21.8% (12) | 10.9% (6) |
| <i>p-value</i> *                                                  | 0.036           |            |            |            |           |
| <b>Induction of remission in active UC</b>                        |                 |            |            |            |           |
| Adult gastroenterologist                                          | 42.9% (9)       | 38.1% (8)  | 14.3% (3)  | 4.8% (1)   | 0% (0)    |
| Paediatric gastroenterologists                                    | 38.2% (13)      | 29.4% (10) | 23.5% (8)  | 2.9% (1)   | 5.9% (2)  |
| Total                                                             | 40% (22)        | 32.7% (18) | 20% (11)   | 3.6% (2)   | 3.6% (2)  |
| <i>p-value</i> *                                                  | 0.765           |            |            |            |           |
| <b>Preoperative optimization</b>                                  |                 |            |            |            |           |
| Adult gastroenterologist                                          | 0% (0)          | 4.8% (1)   | 57.1% (12) | 23.8% (5)  | 14.3% (3) |
| Paediatric gastroenterologists                                    | 11.8% (4)       | 11.8% (4)  | 47.1% (16) | 14.7% (5)  | 14.7% (5) |
| Total                                                             | 7.3% (4)        | 9.1% (5)   | 50.9% (28) | 18.2% (10) | 14.5% (8) |
| <i>p-value</i> *                                                  | 0.474           |            |            |            |           |
| <b>Management of complications (fistula, strictures, abscess)</b> |                 |            |            |            |           |
| Adult gastroenterologist                                          | 0% (0)          | 14.3% (3)  | 66.7% (14) | 9.5% (2)   | 9.5% (2)  |
| Paediatric gastroenterologists                                    | 8.8% (3)        | 14.7% (5)  | 58.8% (20) | 11.8% (4)  | 5.9% (2)  |
| Total                                                             | 5.5% (3)        | 14.5% (8)  | 61.8% (34) | 10.9% (6)  | 7.3% (4)  |
| <i>p-value</i> *                                                  | 0.799           |            |            |            |           |

\*P-value indicate the statistical difference in proportions between groups (using Fisher's exact tests)

**Table S2:** Characteristics of EN practices carried by gastroenterologist who are currently recommending EN in patients with IBD

| EN characteristic variables                                                 | Adult gastroenterologists<br>(n= 21) % (n) | Pediatric gastroenterologists<br>(n=34) % (n) | Total<br>(n= 55) %<br>(n) | <i>p-value</i> * |
|-----------------------------------------------------------------------------|--------------------------------------------|-----------------------------------------------|---------------------------|------------------|
| <b>Common route of feeding</b>                                              |                                            |                                               |                           |                  |
| Start orally and switch to tube feeding only if not tolerated               | 85.7% (18)                                 | 91.2% (31)                                    | 89.1% (49)                | 0.664            |
| Start with tube feeding and switch to oral only if patient unwilling/unable | 14.3% (3)                                  | 8.8% (3)                                      | 10.9% (6)                 |                  |
| <b>First Choice formula type</b>                                            |                                            |                                               |                           |                  |
| Standard formula                                                            | 33.3% (7)                                  | 35.3% (12)                                    | 34.5% (19)                | 0.078            |
| IBD formula (e.g. Modulen)                                                  | 42.9% (9)                                  | 58.8% (20)                                    | 52.7% (29)                |                  |
| Elemental (e.g. Vivonex)                                                    | 0% (0)                                     | 2.9% (1)                                      | 1.8% (1)                  |                  |
| Semi-elemental (e.g. Peptamen)                                              | 0% (0)                                     | 0% (0)                                        | 0% (0)                    |                  |
| Formula selection by dietitian                                              | 23.8% (5)                                  | 2.9% (1)                                      | 10.9% (6)                 |                  |
| <b>Methods of evaluating EN success<sup>§</sup></b>                         |                                            |                                               |                           |                  |
| Endoscopy                                                                   |                                            |                                               |                           |                  |
| Improvement of clinical disease activity index such as (CDAI)               | 19% (4)                                    | 29.4% (10)                                    | 25.5% (14)                | 0.391            |
| Improvement of symptoms                                                     | 42.9% (9)                                  | 76.5% (26)                                    | 63.6% (35)                | 0.012            |
| Nutritional (weight gain)                                                   | 33.3% (7)                                  | 76.5% (26)                                    | 60% (33)                  | 0.002            |
| CRP level                                                                   | 76.2% (16)                                 | 79.4% (27)                                    | 78.2% (43)                | 1.000            |
| ESR level                                                                   | 14.3% (3)                                  | 52.9% (18)                                    | 38.2% (21)                | 0.004            |
| Faecal calprotectin                                                         | 14.3% (3)                                  | 52.9% (18)                                    | 38.2% (21)                | 0.004            |
| Imaging                                                                     | 14.3% (3)                                  | 44.1% (15)                                    | 32.7% (18)                | 0.22             |
|                                                                             | 19% (4)                                    | 17.6% (6)                                     | 18.2% (10)                | 1.000            |
| <b>Frequency of recommending PEN in IBD management</b>                      |                                            |                                               |                           |                  |
| Never 0% of the time                                                        | 9.5% (2)                                   | 5.9% (2)                                      | 7.3% (4)                  | 0.949            |
| Rarely ~10% of the time                                                     | 14.3% (3)                                  | 14.7% (5)                                     | 14.5% (8)                 |                  |
| Sometimes ~25% of the time                                                  | 61.9% (13)                                 | 55.9% (19)                                    | 58.2% (32)                |                  |
| Regularly ~50% of the time                                                  | 9.5% (2)                                   | 11.8% (4)                                     | 10.9% (6)                 |                  |
| Frequently >75% of the time                                                 | 4.8% (1)                                   | 11.8% (4)                                     | 9.1% (5)                  |                  |
| <b>Frequency of recommending EEN in IBD management</b>                      |                                            |                                               |                           |                  |
| Never 0% of the time                                                        | 23.8% (5)                                  | 11.8% (4)                                     | 16.4% (9)                 | 0.000            |
| Rarely ~10% of the time                                                     | 61.9% (13)                                 | 11.8% (4)                                     | 30.9% (17)                |                  |
| Sometimes ~25% of the time                                                  | 0% (0)                                     | 44.1% (15)                                    | 27.3% (15)                |                  |
| Regularly ~50% of the time                                                  | 9.5% (2)                                   | 17.6% (6)                                     | 14.5% (8)                 |                  |
| Frequently >75% of the time                                                 | 4.8% (1)                                   | 14.7% (5)                                     | 10.9% (6)                 |                  |

\*P-value indicates the statistical difference in proportions between groups (using Chi-square and Fisher's exact tests)

§Percentages do not add to be 100% because this is a multiple response variable (participants selected more than one option)
